# Supplementary material for: TWIST1 a New Determinant of Epithelial to Mesenchymal Transition in EGFR Mutated Lung Adenocarcinoma
Source: PubMed Central journal article supplement (PMC3260187; doi:10.1371/journal.pone.0029954), 2012-01-17
Supplement: pone.0029954.s005.pdf [file pone.0029954.s005.pdf]

|     |   |    |            |         |        |          |                    |             |      |      |      |      |      |       |     |     |    |    |    |    |    |    |    |      |    |      |
|-----|---|----|------------|---------|--------|----------|--------------------|-------------|------|------|------|------|------|-------|-----|-----|----|----|----|----|----|----|----|------|----|------|
| 142 | F | 64 | Non smoker | ADC-BAC | T1N0   | Negative | 8,1                | 0,09        | 5,12 | 0,14 | 0,19 | 0,20 | 0,53 | 28,69 | No  | No  | No | No | No | No | No | No | No | 0,89 |    |      |
| 147 | M | 83 | Non smoker | ADC     | T2N1   | Negative | 8,7                | 0,08        | 0,72 | 0,14 | 0,68 | 0,30 | 0,81 | 10,66 | No  | No  | No | No | No | No | No | No | No | 1,09 |    |      |
| 149 | M | 85 | Non smoker | ADC     | T1N0   | Negative | 7,8                | 0,01        | 2,14 | 0,11 | 0,49 | 0,06 | 0,87 | 7,93  | No  | No  | No | No | No | No | No | No | No | 0,87 |    |      |
| 170 | M | 66 | Non smoker | ADC-BAC | T2N0   | Positive | 9,6                | <b>2,03</b> | 0,49 | 3,87 | 0,63 | 0,26 | 0,30 | 0,57  | Yes | No  | No | No | No | No | No | No | No | 0,56 |    |      |
| 201 | F | 56 | Non smoker | ADC     | T2N?   | Negative | 9                  | 0,01        | 0,27 | 0,13 | 0,11 | 0,04 | 0,48 | 8,59  | No  | No  | No | No | No | No | No | No | No | 0,69 |    |      |
| 230 | M | 59 | Smoker     | ADC-BAC | T4N0   | Negative | 8,3                | 1,33        | 1,02 | 2,60 | 1,14 | 0,43 | 0,48 | 0,44  | Yes | Yes | No | No | No | No | No | No | No | 0,63 |    |      |
| 238 | M | 62 | Non smoker | ADC     | T4NOM+ | Negative | 8,5                | 0,51        | 9,99 | 0,10 | 0,22 | 0,39 | 1,13 | 48,79 | No  | ND  | No | ND | No | ND | ND | ND | ND | ND   |    |      |
| 244 | F | 59 | Non smoker | ADC-BAC | T1N0   | Negative | mRNA not available |             |      |      |      |      |      |       | Yes | No  | No | No | No | No | No | No | No | No   | No | 0,97 |
| 245 | M | 46 | Non smoker | ADC     | T4N2   | Negative | 7,3                | 0,35        | 3,13 | 0,07 | 0,20 | 1,10 | 0,94 | 36,68 | No  | No  | No | No | No | No | No | No | No | 0,61 |    |      |
| 247 | F | 75 | Smoker     | ADC-BAC | T2N0   | Negative | 7,3                | <b>8,57</b> | 2,68 | 3,52 | 0,79 | 0,64 | 0,43 | 0,97  | Yes | No  | No | No | No | No | No | No | No | 0,73 |    |      |
| 256 | M | 61 | Non smoker | ADC     | T2N1   | Negative | 7,6                | 0,28        | 1,33 | 0,11 | 0,18 | 0,13 | 1,28 | 25,99 | No  | No  | No | No | No | No | No | No | No | 1,98 |    |      |
| 288 | F | 51 | Non smoker | ADC     | T1N0M+ | Positive | 8,1                | <b>5,44</b> | 4,08 | 1,75 | 1,36 | 3,61 | 0,94 | 2,17  | Yes | No  | No | No | No | No | No | No | No | 0,96 |    |      |
| 341 | F | 76 | Non smoker | ADC-BAC | T2N0   | Negative | mRNA not available |             |      |      |      |      |      |       | Yes | No  | No | No | No | No | No | No | No | No   | No | 0,92 |

TNM: tumor stage defined by Tumor, Node involvement and Metastasis; ADC: adenocarcinoma; BAC: bronchioloalveolar carcinoma; Adsq: adenosquamous carcinoma; IHC: Immuno-Histo-Chemistry; homozygous CDKN2A (P16) deletion is defined by 2\*2-ddCt <0.35
