# Supplementary material for: TWIST1 a New Determinant of Epithelial to Mesenchymal Transition in EGFR Mutated Lung Adenocarcinoma
Source: PubMed Central journal article supplement (PMC3260187; doi:10.1371/journal.pone.0029954), 2012-01-17
Supplement: pone.0029954.s006.pdf [file pone.0029954.s006.pdf]

**Table S2:** Primer sequence for quantitative RT-PCR analyses

| <b>Gene</b>   | <b>Primers</b> |                           |
|---------------|----------------|---------------------------|
| <i>TWIST1</i> | Forward        | GGAGTCCGCAGTCTTACGAG      |
|               | Reverse        | CCAGCTTGAGGGTCTGAATC      |
| <i>POLR2A</i> | Forward        | TCTTCTGCTCCAAACTGCTTGTGG  |
|               | Reverse        | GTCGTAGACATGTGTGAGC       |
| <i>RPL13A</i> | Forward        | CATGAGGCTACGGAAACAGGC     |
|               | Reverse        | AAGGGCAGGCAACGCATGA       |
| <i>YAP1</i>   | Forward        | CACAGCATGTTCGAGC          |
|               | Reverse        | GATGCTGAGCTGTGGGTGTA      |
| <i>JUP</i>    | Forward        | CAGCAGCCCTACACGGATGGTGTGA |
|               | Reverse        | CGGTTCATGGGGTCCCCGGGC     |
| <i>VIM</i>    | Forward        | ATCCAAGTTTGCTGACCTCTCTGAG |
|               | Reverse        | AGGGACTGCACCTGTCTCCGGT    |
| <i>CDH1</i>   | Forward        | GGAACTATGAAAAGTGGGCTTG    |
|               | Reverse        | AAATTGCCAGGCTCAATGAC      |
| <i>CDH2</i>   | Forward        | CTTGTCAGGATCAGGTCT        |
|               | Reverse        | GAAGATACCAGTTGGAGGCT      |
| <i>SNAIL</i>  | Forward        | CTTCCAGCAGCCCTACGAC       |
|               | Reverse        | CGGTGGGGTTGAGGATCT        |
| <i>ZEB1</i>   | Forward        | ACTGCTGGGAGGATGACAGA      |
|               | Reverse        | ATCCTGCTTCATCTGCCTGA      |
| <i>18S</i>    | Forward        | TCCCCCAACTTCTTAGAGG       |
|               | Reverse        | CTTATGACCCGCACTTACTG      |
